# Supplementary material for: Feedback control for shaping density distributions of colloidal particles in microfluidic devices
Source: Royal Society of Chemistry journal article supplement (doi:10.1039/c9lc00192a), 2019-01-01
Supplement: c9lc00192a1.pdf [file c9lc00192a1.pdf]

1. For video-S1:

**Implementation of the feedback control scheme with set point as 2**

2. For video-S2:

**Implementation of the feedback control scheme with set point as 3**

3. For video-S3:

**Implementation of the feedback control scheme with set point as 1/2**

4. For video-S4:

**Implementation of the feedback control scheme with set point as 1/3**
